# Supplementary material for: Molecular engineering of anthracene-based emitters for highly efficient nondoped deep-blue fluorescent OLEDs
Source: Royal Society of Chemistry journal article supplement (doi:10.1039/d0tc01964j), 2020-01-01
Supplement: d0tc01964j1.pdf [file d0tc01964j1.pdf]

## Supporting Information

### Molecular engineering of anthracene-based emitters for highly efficient nondoped deep-blue fluorescent OLEDs

Yaxiong Wang,<sup>a</sup> Wei Liu,<sup>a,b</sup> Shaofeng Ye,<sup>a</sup> Qing Zhang,<sup>a</sup> Yalei Duan,<sup>a</sup> Runda Guo,<sup>\*a</sup> and Lei Wang<sup>\*a</sup>

<sup>a</sup> Wuhan National Laboratory for Optoelectronics, Huazhong University of Science and Technology, Wuhan, 430074, People's Republic of China.

<sup>b</sup> Institute for smart Materials & Engineering, University of Jinan, No. 336 Nanxinzhuan west Road, Jinan 250022, People's Republic of China.

\*Email: [wanglei@mail.hust.edu.cn](mailto:wanglei@mail.hust.edu.cn), [runda\\_guo@hust.edu.cn](mailto:runda_guo@hust.edu.cn).

#### Contents

1. **Fig. S1.** The <sup>1</sup>H NMR spectra of *pCzphAnBzt*.
2. **Fig. S2.** The <sup>13</sup>C NMR spectra of *pCzphAnBzt*.
3. **Fig. S3.** The <sup>1</sup>H NMR spectra of *mCzAnBzt*.
4. **Fig. S4.** The <sup>13</sup>C NMR spectra of *mCzAnBzt*.
5. **Fig. S5.** The <sup>1</sup>H NMR spectra of *m2CzAnBzt*.
6. **Fig. S6.** The <sup>13</sup>C NMR spectra of *m2CzAnBzt*.
7. **Fig. S7.** The normalized UV-vis spectra and normalized PL spectra of *pCzphAnBzt* in different solvents.
8. **Fig. S8.** The normalized UV-vis spectra and normalized PL spectra of *mCzAnBzt* in different solvents.
9. **Fig. S9.** The normalized UV-vis spectra and normalized PL spectra of *m2CzAnBzt* in different solvents.
10. **Table S1.** Detailed information of absorption and emission peak positions of *pCzphAnBzt*, *mCzAnBzt*, *m2CzAnBzt* in different solvents.
11. **Fig. S10.** Cyclic voltammetry scans of *pCzPhAnBzt*, *mCzAnBzt* and *m2CzAnBzt*.
12. **Fig. S11.** Normalized EL spectra of *pCzAnBzt* and *pCzphAnBzt* at 6 V.
13. **Fig. S12.** The hole-only and electron-only devices of *pCzPhAnBzt*-, *mCzAnBzt*- and *m2CzAnBzt*-based nondoped device.
14. **Fig. S13.** Amplified EL decay of the delayed component of *pCzPhAnBzt*-, *mCzAnBzt*- and *m2CzAnBzt*-based nondoped device at 5V.
15. **Fig. S14.** Transient EL decays of *pCzAnBzt* nondoped devices at 5 V.
16. **Table S2.** Optical parameters of *pCzAnBzt*, *pCzphAnBzt*, *mCzAnBzt* and *m2CzAnBzt*-based nondoped devices calculated by transient EL decays at 5V voltage.

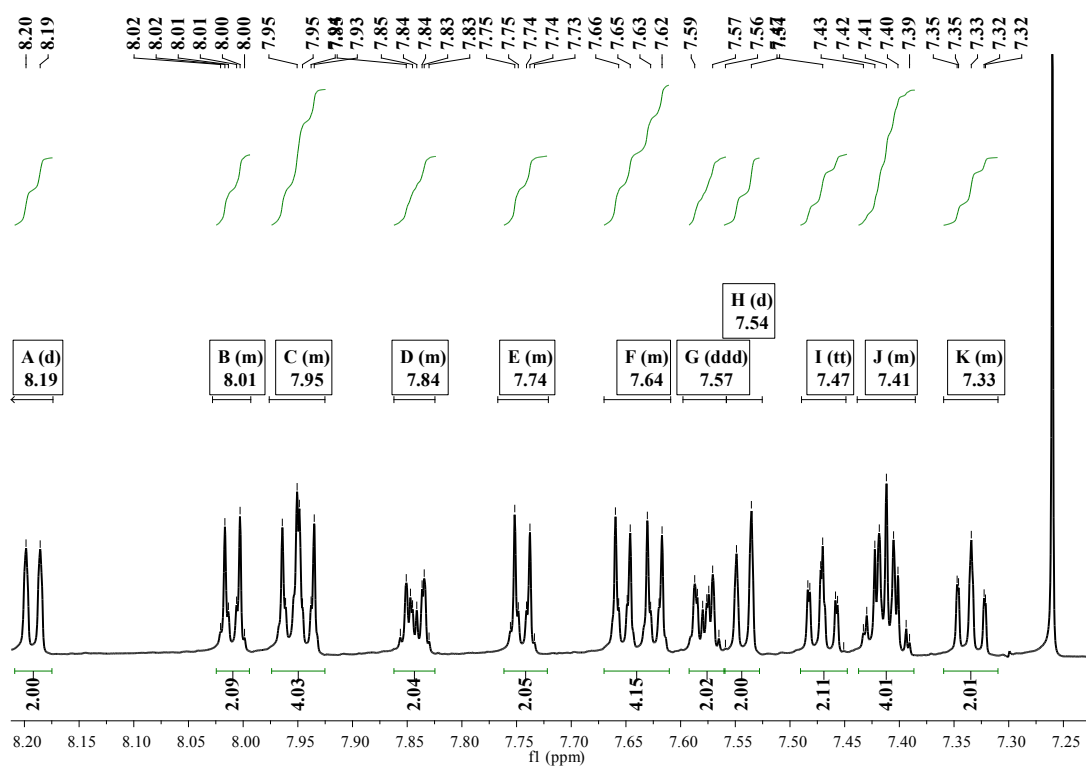

**Fig. S1.** The  $^1\text{H}$  NMR spectra of *pCzphAnBzt*

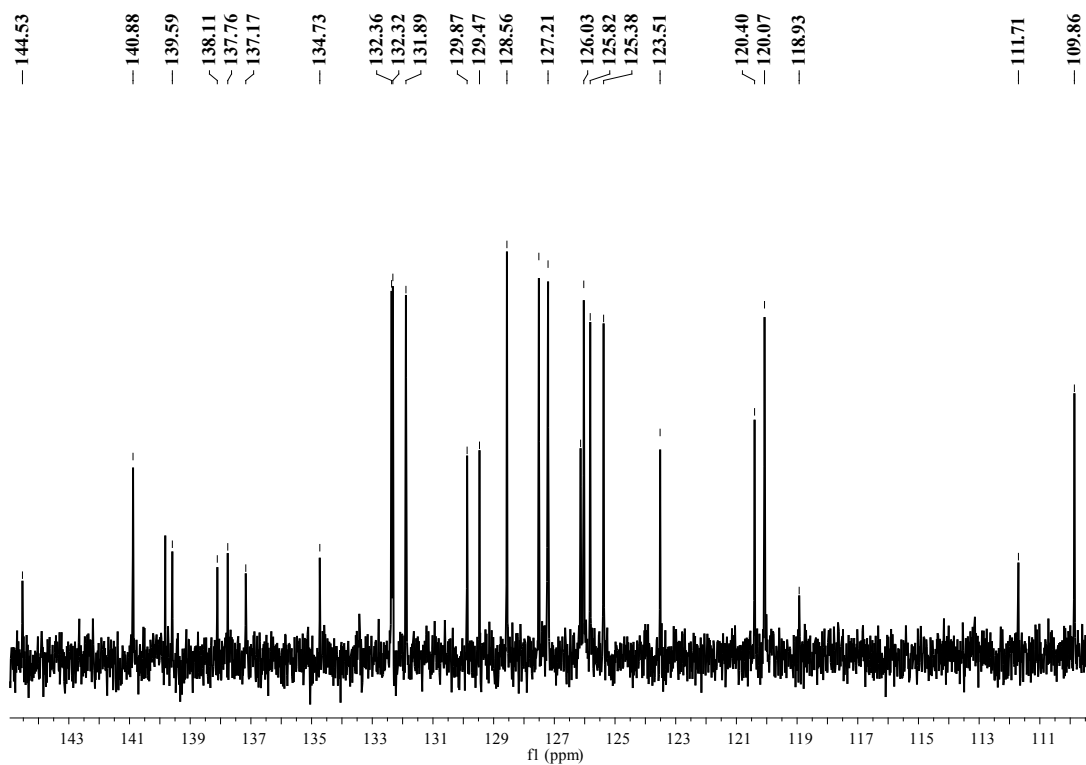

**Fig. S2.** The  $^{13}\text{C}$  NMR spectra of *pCzphAnBzt*.

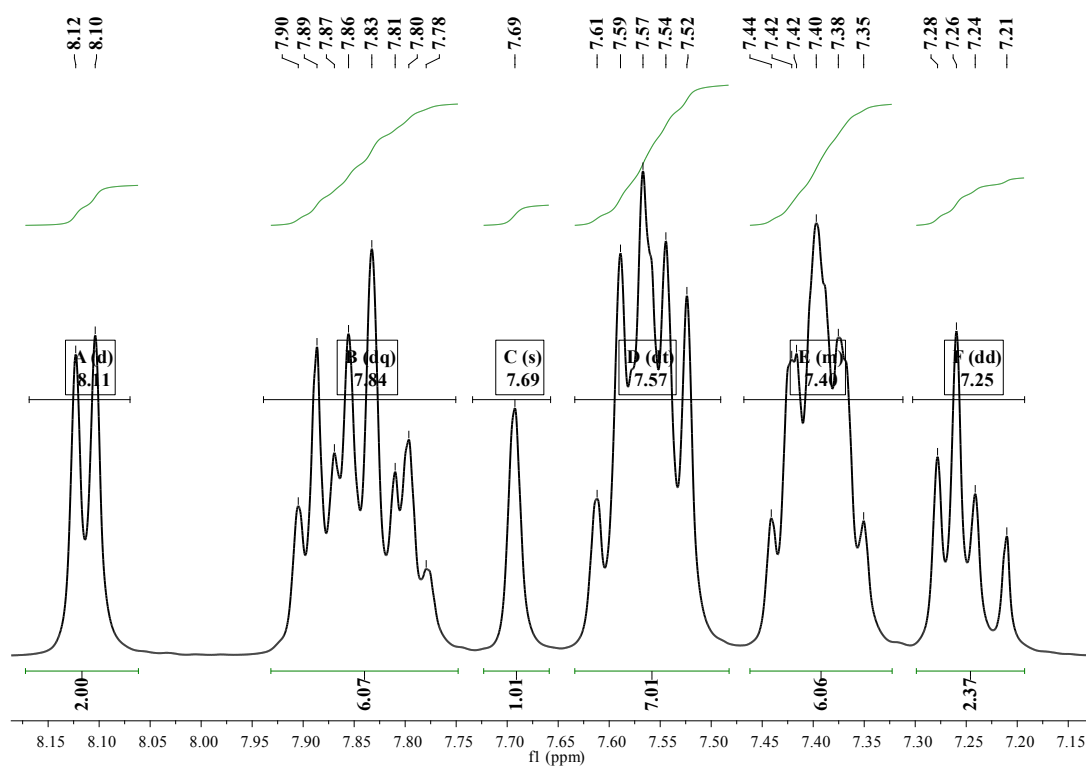

**Fig. S3.** The  $^1\text{H}$  NMR spectra of *mCzAnBzt*.

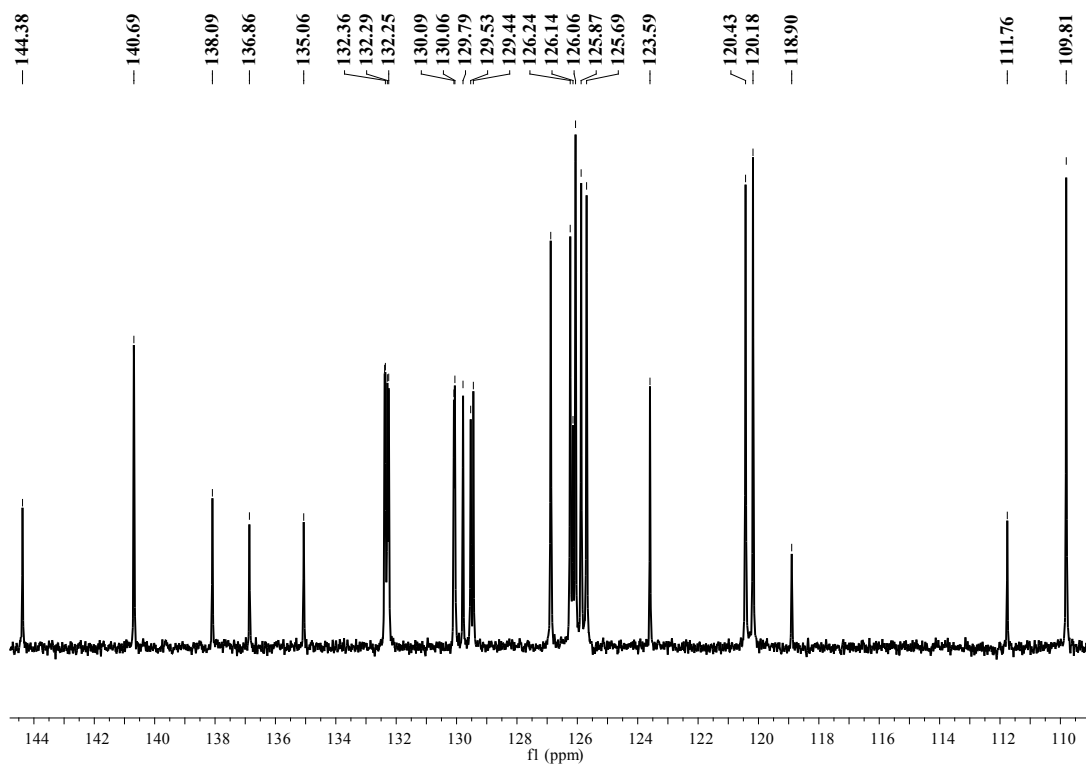

**Fig. S4.** The  $^{13}\text{C}$  NMR spectra of *mCzAnBzt*.

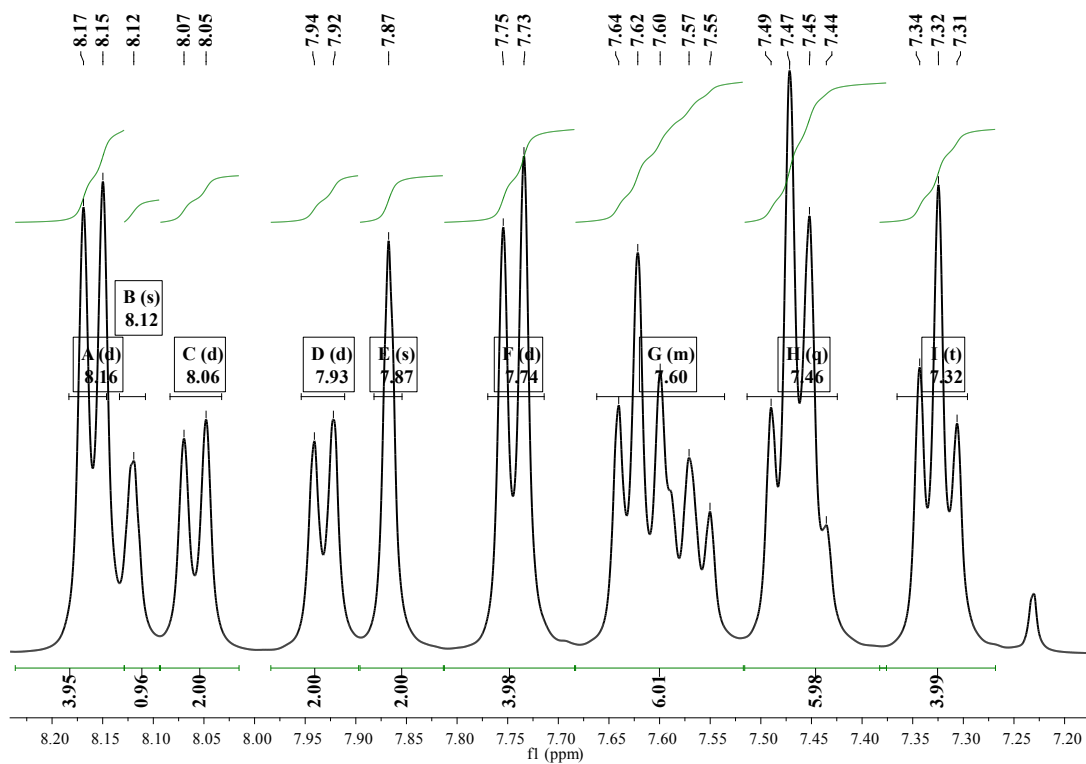

**Fig. S5.** The  $^1\text{H}$  NMR spectra of *m2CzAnBzt*.

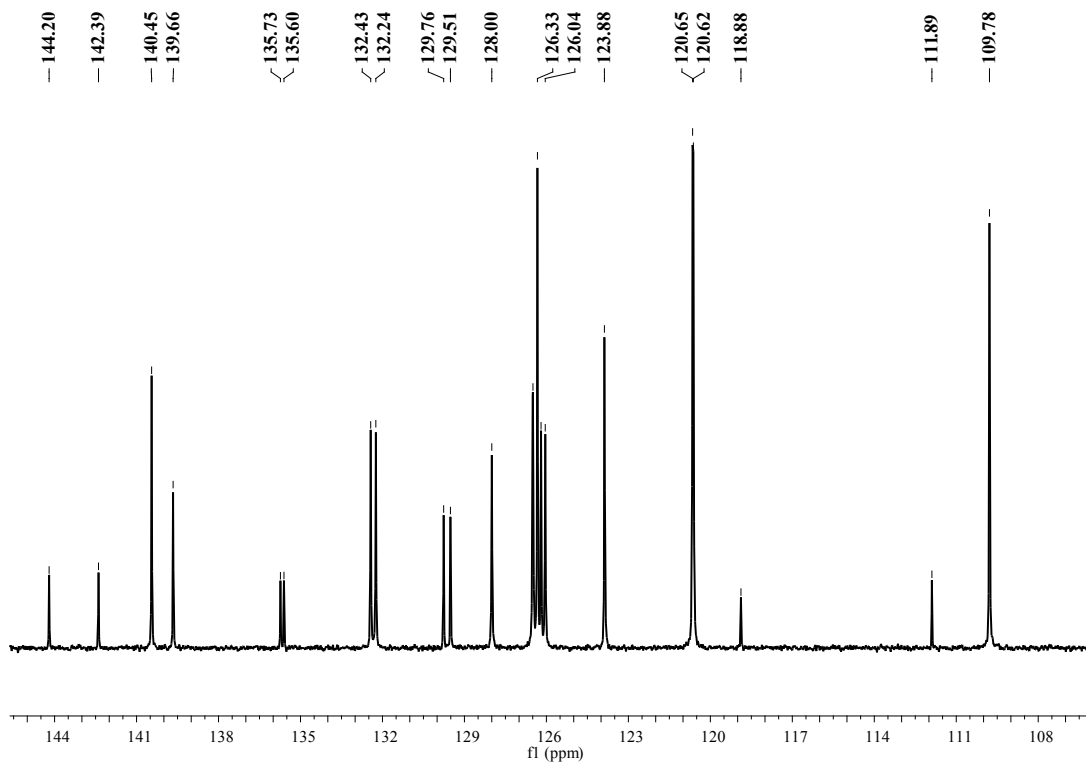

**Fig. S6.** The  $^{13}\text{C}$  NMR spectra of *m2CzAnBzt*.

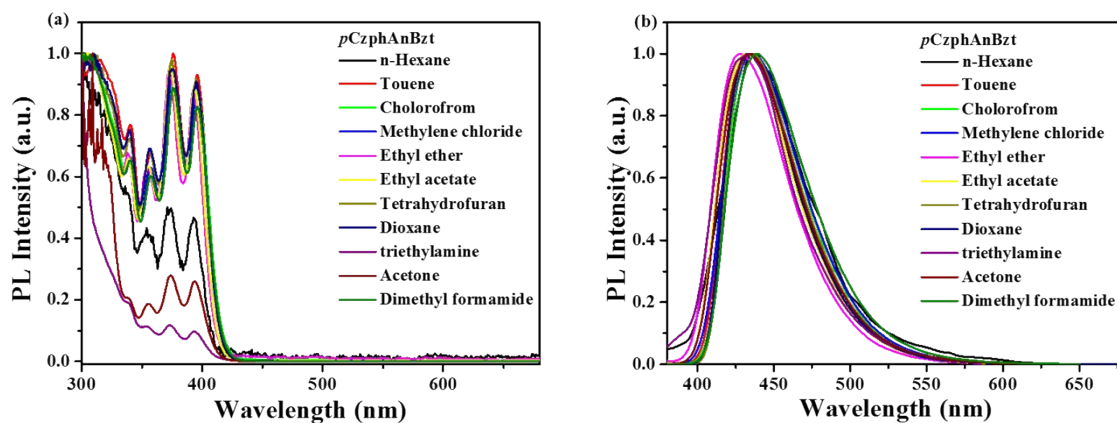

**Fig. S7.** The normalized UV-vis spectra (a) and normalized PL spectra (b) of *pCzphAnBzt* in different solvents.

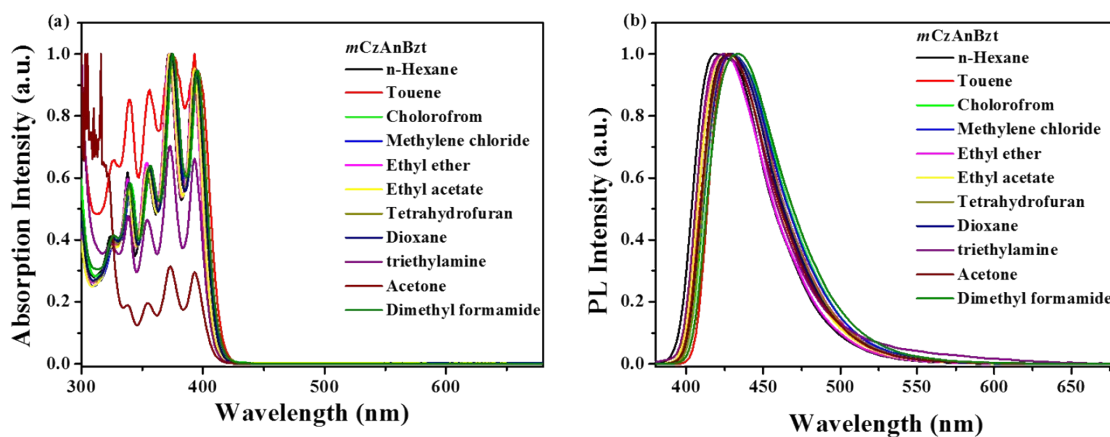

**Fig. S8.** The normalized UV-vis spectra (a) and normalized PL spectra (b) of *mCzAnBzt* in different solvents.

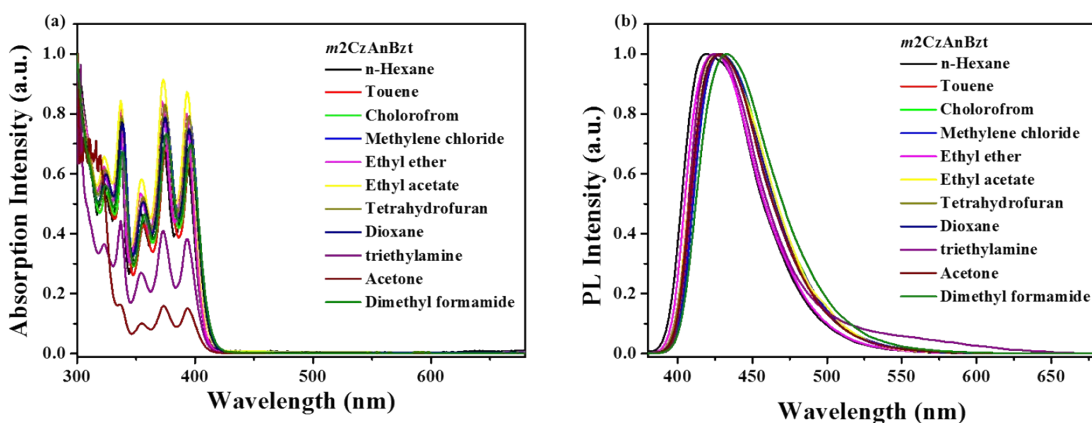

**Fig. S9.** The normalized UV-vis spectra (a) and normalized PL spectra (b) of *m2CzAnBzt* in different solvents.

**Table S1.** Detailed information of absorption and emission peak positions of *pCzphAnBzt*, *mCzAnBzt* and *m2CzAnBzt* in different solvents.

| Solvent            | <i>pCzphAnBzt</i> |                  | <i>mCzAnBzt</i>  |                  | <i>m2CzAnBzt</i> |                  |
|--------------------|-------------------|------------------|------------------|------------------|------------------|------------------|
|                    | $\lambda_a$ (nm)  | $\lambda_f$ (nm) | $\lambda_a$ (nm) | $\lambda_f$ (nm) | $\lambda_a$ (nm) | $\lambda_f$ (nm) |
| Hexane             | 393               | 436              | 392              | 418              | 392              | 420              |
| Touene             | 396               | 433              | 393              | 430              | 396              | 428              |
| Choloroform        | 396               | 436              | 396              | 430              | 396              | 428              |
| Methylene chloride | 396               | 437              | 395              | 430              | 395              | 428              |
| Ethyl ether        | 393               | 428              | 392              | 424              | 393              | 424              |
| Ethyl acetate      | 393               | 432              | 393              | 426              | 393              | 428              |
| Tetrahydrofuran    | 395               | 436              | 394              | 428              | 395              | 428              |
| Dioxane            | 395               | 432              | 395              | 428              | 395              | 428              |
| Triethylamine      | 393               | 434              | 393              | 424              | 393              | 424              |
| Acetone            | 394               | 435              | 393              | 428              | 394              | 428              |
| Dimethyl formamide | 396               | 439              | 395              | 434              | 396              | 432              |

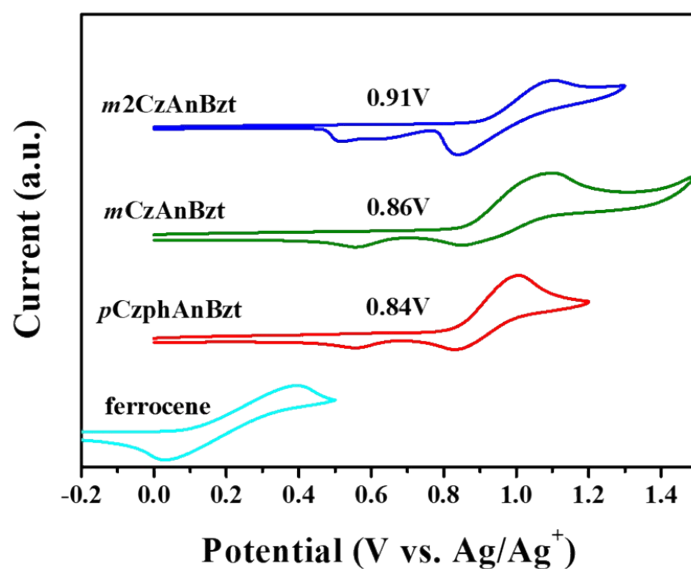

**Fig. S10.** Cyclic voltammety scans of *pCzPhAnBzt*, *mCzAnBzt* and *m2CzAnBzt*.

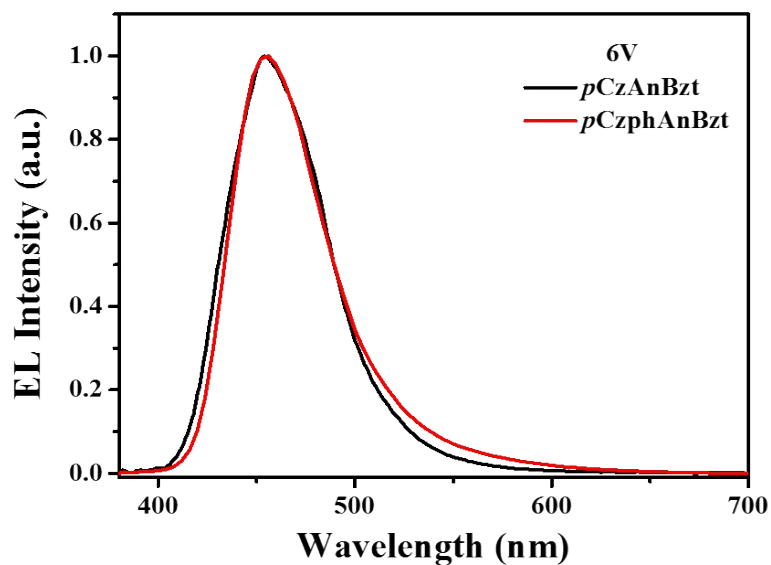

**Fig. S11.** Normalized EL spectra of *pCzAnBzt* and *pCzphAnBzt* at 6 V.

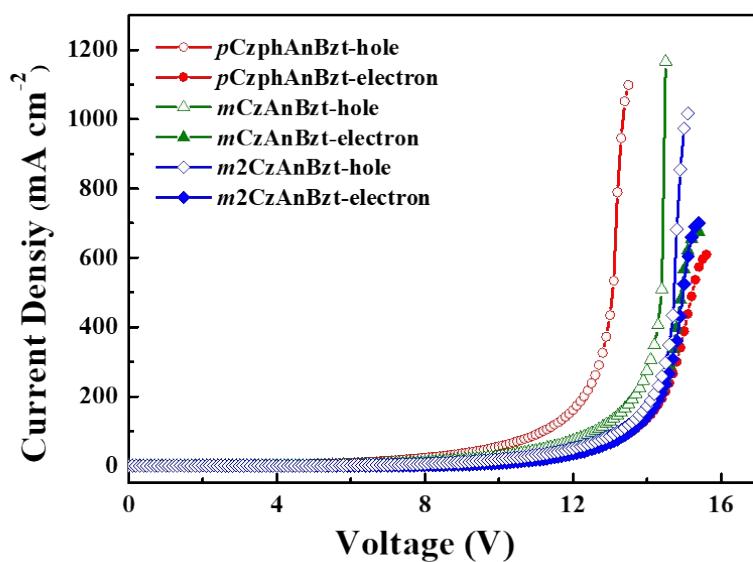

**Fig. S12.** The hole-only and electron-only devices of *pCzPhAnBzt*-, *mCzAnBzt*- and *m2CzAnBzt*-based nondoped device. The devices structure of hole-only: ITO/HATCN (15 nm)/TAPC (50 nm)/TCTA (5 nm)/EML (20 nm)/TCTA (5 nm)/TAPC (50 nm)/HATCN (15 nm)/Al(150 nm), and the devices structure of electron-only: ITO/LiF(1 nm)/TmPyPB (40 nm)/EML (20 nm)/TmPyPB (40 nm)/LiF(1 nm)/Al(150 nm).

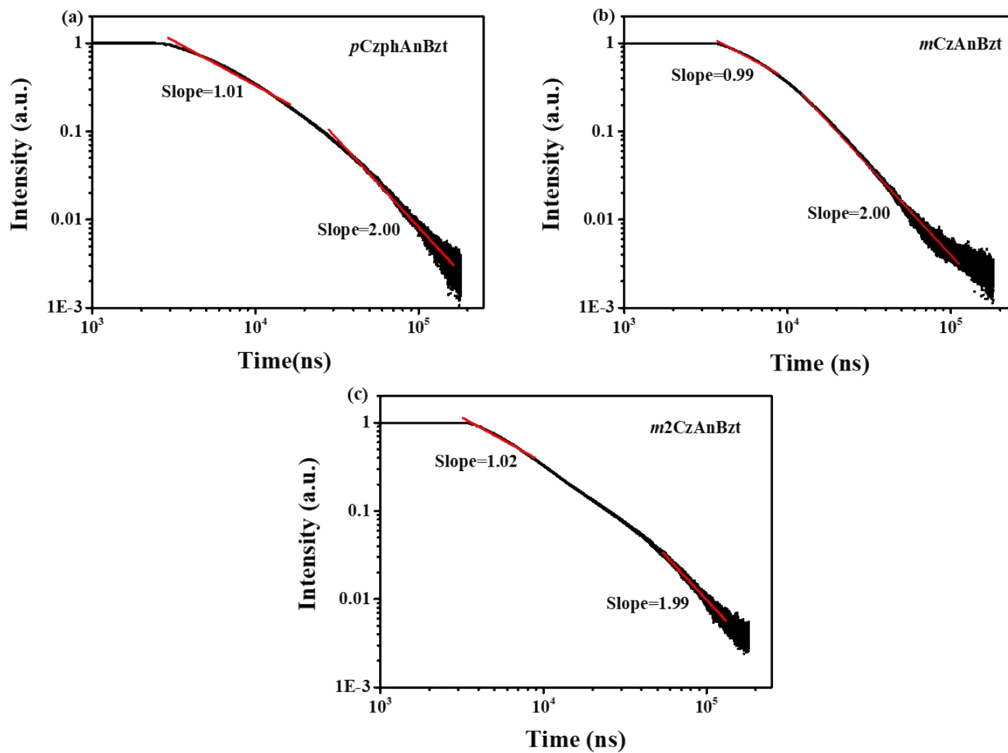

**Fig. S13.** Amplified EL decay of the delayed component of *pCzPhAnBzt*-, *mCzAnBzt*- and *m2CzAnBzt*-based nondoped device at 5V.

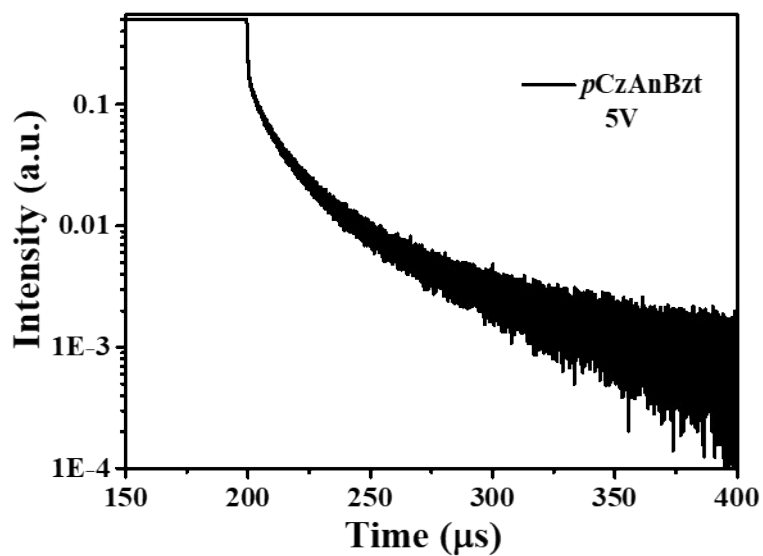

**Fig. S14.** Transient EL decays of *pCzAnBzt*-based nondoped devices at 5 V.



**Table S2.** Optical parameters of *pCzAnBzt*-, *pCzphAnBzt*-, *mCzAnBzt*- and *m2CzAnBzt*-based nondoped devices calculated by transient EL decays at 5V voltage.

| compound          | $I_{\text{delay}}/I_{\text{steady}}$ | $\eta_{\text{TTA}}^{\text{a}}$ | $\eta_{\text{rad}}^{\text{b}}$ | $\text{EQE}_{\text{ca}}^{\text{c}}(\%)$ | $\text{EQE}_{\text{ex}}^{\text{d}}(\%)$ |
|-------------------|--------------------------------------|--------------------------------|--------------------------------|-----------------------------------------|-----------------------------------------|
| <i>pCzAnBzt</i>   | 0.4096                               | 0.1734                         | 0.4234                         | 7.53                                    | 9.23                                    |
| <i>pCzphAnBzt</i> | 0.2980                               | 0.1061                         | 0.3561                         | 3.63                                    | 6.75                                    |
| <i>mCzAnBzt</i>   | 0.1977                               | 0.0616                         | 0.3116                         | 5.89                                    | 7.95                                    |
| <i>m2CzAnBzt</i>  | 0.3228                               | 0.1192                         | 0.3692                         | 5.87                                    | 7.36                                    |

<sup>a</sup> Exciton utilization by TTA process. <sup>b</sup> Total ratio of radiative excitons. <sup>c</sup> EQE calculated using equation  $\text{EQE} = (\gamma \times \eta_{\text{rad}} \times \Phi_{\text{PL}}) \eta_{\text{out}}$ , assuming  $r=1$ ,  $\eta_{\text{out}}=0.3$ . <sup>d</sup> Experiment value.
